# Supplementary material for: Longevity extension in rats via improved redox homeostasis with high carbohydrate diet intervention from weaning to adulthood: a comprehensive multi-omics study
Source: Royal Society of Chemistry journal article supplement (doi:10.1039/d4fo01156b), 2024-01-01
Supplement: d4fo01156b1.pdf [file d4fo01156b1.pdf]

### Dynamic changes of serum in rats

|                           | GLU<br>(mmol/L) | TCHO<br>(mmol/L) | TG<br>(mmol/L) | LDL<br>(mmol/L) | HDL<br>(mmol/L) | ALT<br>(ul/L) | AST<br>(ul/L) | BUN<br>(mmol/L) | CRE<br>(umol/L) |
|---------------------------|-----------------|------------------|----------------|-----------------|-----------------|---------------|---------------|-----------------|-----------------|
| <b>4 Weeks (n=7)</b>      |                 |                  |                |                 |                 |               |               |                 |                 |
| HC                        | 4.81±0.38       | 2.56±0.27        | 0.66±0.16      | 0.66±0.13       | 1.16±0.23       | 34.43±5.56    | 107.43±15.69  | 4.23±0.63       | 23.71±3.35      |
| HP                        | 4.88±0.58       | 2.69±0.25        | 0.63±0.25      | 0.72±0.14       | 1.24±0.20       | 37.29±5.28    | 114.14±16.16  | 4.71±0.99       | 23.57±2.51      |
| HF                        | 4.92±0.54       | 2.77±0.30        | 0.77±0.22      | 0.72±0.14       | 1.07±0.13       | 39.29±7.09    | 115.43±13.70  | 5.07±0.95       | 25.00±2.24      |
| <b>11 Weeks (n=10)</b>    |                 |                  |                |                 |                 |               |               |                 |                 |
| HC                        | 5.18±0.76       | 6.15±0.42        | 2.18±0.31      | 1.44±0.13       | 2.03±0.20       | 43.31±5.37    | 118.00±12.82  | 5.61±1.10       | 36.50±5.04      |
| HP                        | 6.04±0.49*      | 6.59±0.29*       | 2.30±0.21      | 1.52±0.18       | 1.73±0.29*      | 45.60±5.48    | 123.60±13.26  | 5.55±0.77       | 40.80±7.69      |
| HF                        | 5.92±0.91*      | 6.38±0.41        | 2.47±0.35*     | 1.53±0.17       | 1.76±0.40       | 47.23±5.57    | 132.90±12.90* | 6.04±1.14       | 41.70±6.52      |
| <b>61 Weeks (n=10)</b>    |                 |                  |                |                 |                 |               |               |                 |                 |
| HC                        | 5.93±0.47       | 8.11±0.39        | 3.05±0.29      | 2.47±2.80       | 4.23±0.60       | 51.90±6.62    | 128.50±15.28  | 6.84±0.49       | 51.20±3.29      |
| HP                        | 6.68±0.45*      | 8.76±0.47*       | 3.34±0.20*     | 2.82±0.35*      | 4.20±0.43#      | 55.30±6.68    | 129.10±15.77  | 7.11±0.75#      | 52.20±6.43      |
| HF                        | 6.70±0.51**     | 8.60±0.52*       | 3.35±0.25*     | 2.77±0.30*      | 3.32±0.72*      | 58.20±8.74    | 134.10±11.94  | 8.05±0.82*      | 53.80±9.39      |
| <b>101 Weeks (n=7-10)</b> |                 |                  |                |                 |                 |               |               |                 |                 |
| HC                        | 5.89±0.44       | 5.38±0.34        | 2.23±0.34      | 1.78±0.14       | 3.15±0.37       | 48.40±9.74    | 107.10±18.52  | 7.40±1.27       | 32.20±10.49     |
| HP                        | 6.41±0.59*      | 5.63±0.66        | 2.35±0.54      | 2.00±0.22*      | 3.08±0.43       | 52.00±12.53   | 113.70±16.15  | 7.82±1.27       | 36.80±10.70     |
| HF                        | 6.51±0.40*      | 5.61±0.57*       | 2.84±0.68*     | 2.01±0.32*      | 2.76±0.33*      | 56.63±12.83   | 129.43±19.39* | 8.80±1.33*      | 35.93±11.55*    |
