# Supplementary material for: Longevity extension in rats via improved redox homeostasis with high carbohydrate diet intervention from weaning to adulthood: a comprehensive multi-omics study
Source: Royal Society of Chemistry journal article supplement (doi:10.1039/d4fo01156b), 2024-01-01
Supplement: d4fo01156b4.pdf [file d4fo01156b4.pdf]

## Supplementary Material

### 1 Serum Pretreatment and Instrument Condition of Organic Acid, Free Fatty Acid and Amino acid

#### 1.1 Organic acids detection with GC-MS

Serum samples (100  $\mu$ L) were placed in an EP tube and 9  $\mu$ L succinate-2,2,3, 3-D4 solution (100 g/mL) was added as internal standard. 300  $\mu$ L methanol was added as the protein extraction reagent. Vortex-mixed for 4 min, and the supernatant was centrifuged at 14000 rpm/min at 4 °C for 15 min. The supernatant was extracted and centrifuged at 14000 rpm/min at 4 °C for 10min for a second time. Nitrogen was blown for 45 min until completely dry. Subsequently, 30  $\mu$ L methoxide pyridine solution (33 mg/ml) was added. After vortexed for 1.5min, the product was placed in a constant temperature oscillator box at 180 r/min and oximation reaction was conducted at 37 °C for 1.5 h. 45 $\mu$ L of MSTFA derivative reagent was added to the oxime-treated samples. After fully eddy, the samples were further set in a constant temperature oscillating chamber at 40 °C. Afterwards, oscillation at 180 r /min for 10 min, the samples were left for 1h, and the supernatant was transferred to the injection bottle. Per 2 $\mu$ L supernatant preprocessed was transferred to the injection bottle for need.

Chromatographic conditions were tested using the TRACE1310 gas chromatograph and the TSQ9000Evo mass spectrometer (Thermo Finnigan, Austin, TX, USA). The TG-WAX capillary column (30 m  $\times$  0.25 mm, 0.25  $\mu$ m film thickness) was used. The

measured temperature was as follows: (1) the initial temperature was 70 °C, which was increased to 155 °C at a rate of 5 °C/min for 2 min; (2) increased to 170 °C at a rate of 5 °C/min and kept for 2 min; (3) increased to 220 °C at a rate of 5 °C /min for 2 min. Mass spectrometry detection conditions: Delivery line temperature maintained at 250 °C. The solvent delay time was 6 min. The source temperature was 250 °C, the electron energy was 70 eV, and the selective reaction was detected by SRM scanning.

## 1.2 Free-fatty acids detection with GC-MS

Serum samples were thawed in 4 °C and fully mixed about 20 s. A volume of 200 µL thawed serum was transferred into a 10 mL glass tube, then 200 µL internal standard solution (200 µg/mL heptadecanoic acid) and 2 mL KOH-CH<sub>3</sub>OH were added into each sample, vortex-mixed for 30 s and placed at room temperature for 10 min. A certain amount of anhydrous sodium sulfate and 1 mL hexane was added into the test tube, vortex-mixed for 1 min. The solution was centrifuged at 3500 rpm for 5 min and the hexane layer was placed into a 4 mL Eppendorf tube. Then another 1 mL hexane was added into the same tube and extracted the hexane layer again based on the same operation. The collection was discarded. Subsequently, 2 mL 10% H<sub>2</sub>SO<sub>4</sub>-CH<sub>3</sub>OH was added into the residuary serum, reacted at 62 °C water bath for 2 h. After the solution cooled to the room temperature, some anhydrous sodium sulfate was added to remove traces of water. After adding 2 mL hexane and mixing for 1 min, the hexane layer was collected and transferred to a new tube after centrifuging at 3500 rpm for 5 min. Then collection was evaporated to dryness under N<sub>2</sub> by Bath Nitrogen Blow Instrument

(TTL-DCI, Beijing, China) and reconstituted in 100  $\mu$ L hexane. The solution was centrifuged at 3500 rpm for 30 s and placed into a sampling vial pending for free fatty acids (FFA) analysis by GC-TQ-MS/MS.

For GC-TQ-MS/MS analysis, a TRACE 1310 gas chromatograph coupled with a TSQ 8000 Evo mass spectrometer (Thermo Finnigan, Austin, Texas, USA) was used. Helium was used as the carrier gas. A split injector (the split ratio being 1:10) was used to add the sample (1.0  $\mu$ L) onto a Thermo TG-WAX MS (30 m $\times$ 0.25 mm I.D., 0.25  $\mu$ m film thickness) capillary column at 230  $^{\circ}$ C. Free fatty acid methyl esters were separated in constant flow by the following oven program: (1) after the initial temperature is 50  $^{\circ}$ C for 1 min, the temperature was raised to 200  $^{\circ}$ C at the speed of 10  $^{\circ}$ C/min and kept for 10 min; (2) raised the temperature to 220  $^{\circ}$ C at a speed of 5  $^{\circ}$ C/min and kept it for 11 min. Mass spectrometry detection conditions: the temperature of the transmission line was maintained at 230  $^{\circ}$ C. The solvent delay time was 5 min. The source temperature was 230  $^{\circ}$ C and the electron energy was 70eV. The triple quadrupole mass spectrometer was operated under electron impact ionization mode. The Mass spectra of m/z 30-450 was collected by multiple reaction monitoring for MS/MS measurement.

### 1.3 Amino acid detection with UPLC-TQ-MS

As usual, our sample needed pretreatment. We took the serum to be tested out of the refrigerator at  $-80^{\circ}$ C and put it into the refrigerator at 4  $^{\circ}$ C for melting. The serum and additives were vortexed, and 30  $\mu$ L of the serum mixture was added into an EP tube

with 10  $\mu\text{L}$  (100  $\mu\text{g}/\text{mL}$ ) of stable isotope labeled valine-d8 and phenylalanine-d8 as a mixed internal standard solution. 80  $\mu\text{L}$  of sample treatment solution (74.9% methanol, 24.9% acetonitrile, 0.2% formic acid), swirled for 30 s, and let it stand on ice for 30 min. Centrifuged (4  $^{\circ}\text{C}$ , 15000 rpm/min, 20 min), and the supernatant was put into a new EP tube. Overnight at -20  $^{\circ}\text{C}$  (12 h), and the second centrifugation (4  $^{\circ}\text{C}$ , 15000 rpm/min, 15 min). Later the supernatant prepared at the inner liner tube was placed 2  $\mu\text{L}$  of it into the liquid injection tray for detecting.

ACQUITY<sup>TM</sup> UPLC system (Waters Corporation, Milford, USA) and the HILIC column (100 mm  $\times$  2.1 mm  $\times$  1.7  $\mu\text{m}$ , Waters Corporation, Milford, USA) were prepared. The flow rate was 0.30 mL/min, and the injection volume per needle was 2  $\mu\text{L}$ . The mobile phase A was 0.2% formic acid, 5% acetonitrile and 2.5 mmol/L ammonium formate dissolved in water. The mobile phase B was 0.2% formic acid, 5% water and 2.5 mmol/L ammonium formate dissolved in acetonitrile. Gradient elution procedure was as follows: (1) 5% A concentration for 0 - 0.5 min; (2) increased to 40% within 6 min; (3) increased to 50% within 6-7 min; (4) 50% A kept for 7-8 min, and balanced to initial conditions within 8-15 min. Mass spectrometry detection conditions: Waters Xevo TQD mass spectrometer (Waters Corporation, Manchester, UK) was used. The flow rate was 650 L/h and the cone gas flow rate was 50 L/h. The temperature of desolvation gas was 400  $^{\circ}\text{C}$ , and the temperature of ion source was 150  $^{\circ}\text{C}$ . The capillary voltage was 3200 V.

**Table S1 The organic acid profiles of rat serum.**

| Organic acid ( $\mu\text{g/mL}$ ) | HC (n = 7)             | HP (n = 7)             | HF (n = 7)             | VIP      |          |          | P     |       |       |
|-----------------------------------|------------------------|------------------------|------------------------|----------|----------|----------|-------|-------|-------|
|                                   |                        |                        |                        | HC-HP    | HC-HF    | HF-HP    | HC-HP | HC-HF | HF-HP |
| Pyruvic acid                      | 69.52 $\pm$ 17.35      | 30.70 $\pm$ 10.80      | 57.02 $\pm$ 12.87      | 1.23785  | 1.21043  | 1.29716  | 0.001 | 0.064 | 0.008 |
| Lactic acid                       | 26644.20 $\pm$ 4611.28 | 15410.69 $\pm$ 4455.62 | 21440.60 $\pm$ 3167.11 | 1.21156  | 0.917632 | 1.21052  | 0.002 | 0.294 | 0.019 |
| Caproic acid                      | 34.27 $\pm$ 6.18       | 36.89 $\pm$ 6.94       | 26.74 $\pm$ 10.64      | 0.866183 | 0.921029 | 0.916971 | 0.556 | 0.164 | 0.055 |
| Glycolic acid                     | 5.48 $\pm$ 1.30        | 4.02 $\pm$ 1.51        | 4.78 $\pm$ 2.22        | 0.88518  | 0.915384 | 0.923306 | 0.225 | 0.866 | 0.17  |
| 2-Hydroxybutyric acid             | 59.35 $\pm$ 34.28      | 174.45 $\pm$ 119.97    | 93.95 $\pm$ 50.70      | 0.843044 | 0.817649 | 0.889678 | 0.117 | 0.616 | 0.27  |
| Oxalic acid                       | 450.36 $\pm$ 83.07     | 350.12 $\pm$ 67.53     | 336.21 $\pm$ 117.96    | 1.27358  | 1.26238  | 1.10404  | 0.003 | 0.01  | 0.546 |
| 3-Hydroxybutyrate acid            | 87.11 $\pm$ 35.46      | 212.80 $\pm$ 118.06    | 98.45 $\pm$ 60.56      | 1.01037  | 1.10415  | 1.0941   | 0.081 | 0.889 | 0.146 |
| Malonic                           | 1.94 $\pm$ 0.11        | 1.92 $\pm$ 0.05        | 1.94 $\pm$ 0.05        | 0.83816  | 0.809676 | 1.00941  | 0.587 | 0.958 | 0.624 |
| Methylmalonic acid                | 2.63 $\pm$ 1.05        | 2.31 $\pm$ 0.59        | 2.73 $\pm$ 0.46        | 0.336962 | 0.609782 | 0.866545 | 0.41  | 0.825 | 0.299 |
| 2-Hydroxyisocaproic acid          | 13.43 $\pm$ 4.97       | 9.62 $\pm$ 2.07        | 8.32 $\pm$ 1.72        | 0.84197  | 1.3258   | 0.887196 | 0.042 | 0.023 | 0.776 |
| Caprylic acid                     | 3.59 $\pm$ 0.31        | 4.17 $\pm$ 0.60        | 3.46 $\pm$ 0.61        | 1.29128  | 1.19041  | 1.12712  | 0.082 | 0.973 | 0.076 |
| Ethylmalonic acid                 | 0.26 $\pm$ 0.06        | 0.20 $\pm$ 0.06        | 0.20 $\pm$ 0.04        | 0.933676 | 1.10223  | 0.811634 | 0.089 | 0.135 | 0.816 |
| Succinic acid                     | 2.57 $\pm$ 1.30        | 2.90 $\pm$ 0.65        | 3.48 $\pm$ 1.32        | 0.751256 | 0.700072 | 0.816278 | 0.619 | 0.374 | 0.69  |
| Fumaric acid                      | 0.55 $\pm$ 0.12        | 0.38 $\pm$ 0.14        | 0.74 $\pm$ 0.37        | 1.16862  | 1.07658  | 1.13951  | 0.167 | 0.172 | 0.01  |
| Glutaric acid                     | 0.25 $\pm$ 0.06        | 0.22 $\pm$ 0.02        | 0.26 $\pm$ 0.08        | 0.653998 | 0.673453 | 0.891476 | 0.288 | 0.825 | 0.204 |
| Capric acid                       | 6.62 $\pm$ 0.68        | 8.63 $\pm$ 0.78        | 6.69 $\pm$ 1.69        | 1.34921  | 1.24632  | 1.22886  | 0.008 | 0.719 | 0.017 |
| Oxaloacetic acid                  | 1.77 $\pm$ 0.04        | 1.69 $\pm$ 0.08        | 1.69 $\pm$ 0.08        | 1.07693  | 1.12574  | 0.651609 | 0.037 | 0.053 | 0.866 |
| Malic acid                        | 54.57 $\pm$ 19.38      | 29.73 $\pm$ 14.83      | 66.77 $\pm$ 34.51      | 1.17783  | 1.03169  | 1.16799  | 0.057 | 0.393 | 0.009 |
| Adipic acid                       | 0.14 $\pm$ 0.05        | 0.13 $\pm$ 0.02        | 0.12 $\pm$ 0.02        | 0.828515 | 0.966121 | 0.876401 | 0.717 | 0.276 | 0.46  |
| Pyroglutamic acid                 | 21.44 $\pm$ 6.75       | 12.56 $\pm$ 2.81       | 15.11 $\pm$ 4.28       | 1.27183  | 1.18275  | 1.17431  | 0.034 | 0.012 | 0.628 |
| $\alpha$ -ketoglutaric acid       | 17.72 $\pm$ 3.63       | 7.76 $\pm$ 2.13        | 15.16 $\pm$ 6.03       | 1.30038  | 1.17334  | 1.16604  | 0.001 | 0.45  | 0.013 |

---

|                                         |                 |                 |               |          |          |          |       |       |       |
|-----------------------------------------|-----------------|-----------------|---------------|----------|----------|----------|-------|-------|-------|
| Phospho-pyruvic acid monopotassium salt | 3.25 ± 0.62     | 2.78 ± 0.28     | 2.66 ± 0.11   | 0.6892   | 1.06697  | 0.892745 | 0.196 | 0.081 | 0.658 |
| Pimelic acid                            | 0.51 ± 0.05     | 0.47 ± 0.02     | 0.49 ± 0.02   | 1.04242  | 0.91206  | 1.08046  | 0.035 | 0.331 | 0.215 |
| Suberic acid                            | 0.32 ± 0.08     | 0.23 ± 0.05     | 0.27 ± 0.07   | 1.36558  | 1.14055  | 1.23726  | 0.038 | 0.462 | 0.155 |
| Orotic acid                             | 0.66 ± 0.24     | 0.41 ± 0.11     | 0.61 ± 0.37   | 0.750576 | 0.494449 | 0.809244 | 0.196 | 0.507 | 0.514 |
| Cis-aconitic acid                       | 0.45 ± 0.23     | 0.43 ± 0.14     | 0.52 ± 0.13   | 0.729388 | 0.886351 | 0.913829 | 0.884 | 0.204 | 0.16  |
| Citric acid                             | 133.14 ± 126.97 | 112.04 ± 169.08 | 86.44 ± 57.49 | 0.814358 | 0.887027 | 0.728824 | 0.753 | 0.448 | 0.654 |
| Isocitric acid                          | 0.77 ± 0.30     | 0.72 ± 0.29     | 0.70 ± 0.18   | 0.827946 | 0.75115  | 0.721688 | 0.75  | 0.516 | 0.739 |
| Sebacic acid                            | 8.53 ± 4.36     | 6.66 ± 2.49     | 7.85 ± 2.62   | 0.67651  | 0.871321 | 0.928944 | 0.281 | 0.534 | 0.638 |

---

**Table S2 The amino acid profiles of rat serum.**

| Amino acid ( $\mu\text{g/mL}$ ) | HC (n = 5)             | HP (n = 5)           | HF (n = 5)            | VIP      |          |          | <i>P</i> |       |       |
|---------------------------------|------------------------|----------------------|-----------------------|----------|----------|----------|----------|-------|-------|
|                                 |                        |                      |                       | HC-HP    | HC-HF    | HF-HP    | HC-HP    | HC-HF | HF-HP |
| Glycine                         | 118.62 $\pm$ 44.91     | 88.24 $\pm$ 20.69    | 191.04 $\pm$ 54.69    | 0.904306 | 0.6487   | 1.08118  | 0.002    | 0.02  | 0.281 |
| Creatinine                      | 33.80 $\pm$ 5.43       | 547.30 $\pm$ 7.34    | 99.38 $\pm$ 34.37     | 0.929164 | 0.92403  | 0.95679  | 0.033    | 0.031 | 0.065 |
| Threonine                       | 99.42 $\pm$ 12.06      | 98.10 $\pm$ 26.39    | 121.30 $\pm$ 24.81    | 0.940785 | 1.02503  | 0.92603  | 0.122    | 0.142 | 0.926 |
| Valine                          | 61.44 $\pm$ 7.92       | 75.34 $\pm$ 5.40     | 67.22 $\pm$ 8.76      | 1.06361  | 0.6487   | 1.19068  | 0.113    | 0.246 | 0.013 |
| Proline                         | 93.80 $\pm$ 38.51      | 82.82 $\pm$ 16.43    | 100.34 $\pm$ 19.05    | 1.24832  | 1.18757  | 1.10484  | 0.318    | 0.704 | 0.526 |
| Methionine                      | 7.16 $\pm$ 0.77        | 6.96 $\pm$ 1.10      | 9.64 $\pm$ 1.84       | 0.93963  | 0.963905 | 0.888761 | 0.007    | 0.011 | 0.814 |
| Isoleucine                      | 31.24 $\pm$ 4.19       | 34.38 $\pm$ 2.84     | 49.26 $\pm$ 7.96      | 1.01448  | 1.0456   | 0.977565 | 0.001    | 0.001 | 0.38  |
| Phenylalanine                   | 41.22 $\pm$ 5.08       | 43.06 $\pm$ 3.34     | 49.10 $\pm$ 7.77      | 0.979714 | 0.942462 | 0.917213 | 0.133    | 0.057 | 0.632 |
| Tyrosine                        | 20.32 $\pm$ 3.77       | 21.08 $\pm$ 7.57     | 23.90 $\pm$ 7.31      | 0.888107 | 0.898562 | 0.861632 | 0.503    | 0.398 | 0.855 |
| Bingansuan                      | 529.18 $\pm$ 141.16    | 419.3 $\pm$ 152.73   | 873.44 $\pm$ 173.62   | 0.993592 | 0.995617 | 1.00708  | 0.001    | 0.005 | 0.288 |
| Trimethy                        | 5.02 $\pm$ 3.24        | 3.76 $\pm$ 2.28      | 39.68 $\pm$ 31.03     | 0.976149 | 0.805781 | 0.95831  | 0.146    | 0.16  | 0.855 |
| Aminbutyric acid                | 2.28 $\pm$ 1.23        | 2.30 $\pm$ 0.69      | 9.60 $\pm$ 1.51       | 1.11443  | 1.12952  | 1.08921  | 0.001    | 0.001 | 0.979 |
| Dimethylglycine                 | 4.42 $\pm$ 2.46        | 4.94 $\pm$ 1.53      | 19.88 $\pm$ 4.17      | 1.07147  | 1.11894  | 1.08658  | 0.001    | 0.001 | 0.784 |
| Serine                          | 138.88 $\pm$ 30.82     | 152.08 $\pm$ 30.07   | 258.84 $\pm$ 50.10    | 0.976695 | 1.02426  | 0.935963 | 0.001    | 0.001 | 0.594 |
| 43-Homs                         | 3.76 $\pm$ 1.33        | 4.66 $\pm$ 1.36      | 3.86 $\pm$ 1.07       | 1.04806  | 0.844579 | 0.966205 | 0.336    | 0.902 | 0.282 |
| Lysine                          | 6532.42 $\pm$ 1155.228 | 5863.72 $\pm$ 749.27 | 9840.08 $\pm$ 1701.56 | 1.1979   | 1.22654  | 1.09102  | 0.001    | 0.001 | 0.419 |
| Glutamine                       | 155.76 $\pm$ 34.59     | 162.9 $\pm$ 38.78    | 238.22 $\pm$ 65.39    | 1.01299  | 1.13029  | 0.9747   | 0.03     | 0.019 | 0.819 |
| Tryptophan                      | 16.54 $\pm$ 3.78       | 19.14 $\pm$ 3.97     | 14.10 $\pm$ 3.65      | 0.845137 | 0.870829 | 1.11627  | 0.058    | 0.33  | 0.301 |
| Arginine                        | 19.80 $\pm$ 17.38      | 33.38 $\pm$ 14.87    | 68.26 $\pm$ 33.64     | 0.749796 | 1.01637  | 0.877524 | 0.203    | 0.076 | 0.498 |
| Glutamic acid                   | 45.84 $\pm$ 9.56       | 47.16 $\pm$ 11.28    | 85.72 $\pm$ 17.19     | 0.977149 | 1.04344  | 0.946167 | 0.001    | 0.001 | 0.876 |
| Creatine                        | 59.74 $\pm$ 10.17      | 74.94 $\pm$ 11.98    | 91.10 $\pm$ 37.62     | 0.870227 | 0.870011 | 0.853383 | 0.748    | 0.316 | 0.165 |

---

|                             |                   |                  |                    |          |          |          |       |       |       |
|-----------------------------|-------------------|------------------|--------------------|----------|----------|----------|-------|-------|-------|
| Taurine                     | 14.34 ± 1.33      | 14.86 ± 1.16     | 20.04 ± 1.81       | 0.96698  | 1.00481  | 0.951494 | 0.001 | 0.001 | 0.583 |
| 4-hydro                     | 6.60 ± 3.30       | 6.46 ± 1.99      | 7.70 ± 1.11        | 1.17365  | 1.23288  | 1.13028  | 0.414 | 0.467 | 0.925 |
| Leucine                     | 16.26 ± 1.13      | 18.40 ± 1.30     | 25.52 ± 4.20       | 1.02376  | 1.04061  | 0.980091 | 0.001 | 0.001 | 0.221 |
| Histidine                   | 62.66 ± 18.48     | 65.98 ± 10.05    | 62.42 ± 9.54       | 0.94503  | 1.00985  | 0.962516 | 0.68  | 0.978 | 0.701 |
| Citrulline                  | 11.18 ± 5.39      | 16.24 ± 6.25     | 38.14 ± 8.40       | 1.02858  | 1.07118  | 1.05565  | 0.001 | 0.001 | 0.262 |
| Asparagine                  | 25.40 ± 7.17      | 19.64 ± 4.88     | 31.00 ± 6.91       | 0.956942 | 0.841981 | 1.00882  | 0.016 | 0.192 | 0.18  |
| $\gamma$ -aminobutyric acid | 7687.66 ± 1111.88 | 6393.06 ± 864.26 | 10904.70 ± 1187.82 | 1.01196  | 1.07901  | 0.999655 | 0.001 | 0.001 | 0.078 |

---

**Table S3 The fatty acid profiles of rat serum.**

| Fatty acid ( $\mu\text{g/mL}$ ) | HC (n = 5)           | HP (n = 5)           | HF (n = 5)           | VIP      |          |          | <i>P</i> |        |        |
|---------------------------------|----------------------|----------------------|----------------------|----------|----------|----------|----------|--------|--------|
|                                 |                      |                      |                      | HC-HP    | HC-HF    | HF-HP    | HC-HP    | HC-HF  | HF-HP  |
| C14:0                           | 2.63 $\pm$ 0.55      | 3.13 $\pm$ 0.39      | 1.33 $\pm$ 0.60      | 0.84174  | 1.10025  | 0.977107 | 0.219    | 0.001  | <0.001 |
| C16:1                           | 65.95 $\pm$ 15.31    | 92.51 $\pm$ 5.11     | 81.94 $\pm$ 36.05    | 0.88343  | 0.80905  | 0.933852 | 0.056    | 0.827  | 883    |
| C16:0                           | 36.32 $\pm$ 5.25     | 46.60 $\pm$ 1.88     | 34.21 $\pm$ 4.51     | 1.0284   | 0.917552 | 0.984831 | 0.005    | 0.225  | <0.001 |
| C18:0                           | 327.09 $\pm$ 111.19  | 440.14 $\pm$ 20.51   | 300.71 $\pm$ 118.68  | 1.02625  | 0.854206 | 0.898268 | 0.042    | 0.0954 | 0.038  |
| C18:1                           | 184.65 $\pm$ 59.71   | 239.92 $\pm$ 10.34   | 180.46 $\pm$ 76.98   | 0.998138 | 0.858086 | 0.864704 | 0.083    | 0.82   | 0.122  |
| C18:2                           | 542.55 $\pm$ 102.33  | 878.45 $\pm$ 185.39  | 452.32 $\pm$ 169.42  | 0.98534  | 0.962649 | 0.974098 | 0.008    | 0.282  | 0.001  |
| C18:3 $\gamma$                  | 16.91 $\pm$ 1.92     | 22.87 $\pm$ 14.37    | 11.22 $\pm$ 6.52     | 0.82948  | 0.928352 | 0.88439  | 0.681    | 0.385  | 0.357  |
| C18:4                           | 0.66 $\pm$ 0.02      | 0.66 $\pm$ 0.02      | 0.62 $\pm$ 0.02      | 1.24072  | 0.917561 | 0.981023 | 0.982    | 0.021  | 0.02   |
| C18:3 $\alpha$                  | 1.95 $\pm$ 0.71      | 2.54 $\pm$ 0.80      | 1.20 $\pm$ 0.56      | 1.03335  | 0.922909 | 0.931788 | 0.4      | 0.05   | 0.01   |
| C20:2                           | 19.29 $\pm$ 6.87     | 12.91 $\pm$ 4.51     | 41.16 $\pm$ 38.99    | 0.770267 | 0.975902 | 0.903358 | 0.146    | 0.636  | 0.398  |
| C20:3                           | 11.60 $\pm$ 1.58     | 14.43 $\pm$ 4.95     | 10.57 $\pm$ 5.95     | 1.05444  | 0.964084 | 1.09729  | 0.346    | 0.727  | 0.206  |
| C20:4                           | 1850.20 $\pm$ 234.11 | 2745.10 $\pm$ 635.40 | 1165.05 $\pm$ 530.33 | 0.987674 | 0.928787 | 0.962419 | 0.007    | 0.105  | <0.001 |
| C20:5                           | 3.71 $\pm$ 0.46      | 2.96 $\pm$ 0.23      | 2.39 $\pm$ 0.12      | 0.767307 | 1.79396  | 1.36398  | 0.135    | 0.011  | 0.006  |
| C22:4                           | 41.39 $\pm$ 5.72     | 66.89 $\pm$ 15.09    | 42.62 $\pm$ 15.98    | 1.28775  | 0.75144  | 1.08524  | 0.026    | 0.704  | 0.013  |
| C22:5                           | 66.68 $\pm$ 10.27    | 80.49 $\pm$ 13.14    | 51.44 $\pm$ 22.93    | 1.0885   | 0.946653 | 1.04308  | 0.305    | 0.108  | 0.016  |
| C22:6                           | 1262.06 $\pm$ 232.62 | 2068.11 $\pm$ 363.92 | 1065.98 $\pm$ 526.86 | 1.01257  | 0.959795 | 1.00721  | 0.004    | 0.685  | 0.002  |

**Table S4 Reagents.**

| <b>REAGENT or RESOURCE</b>        | <b>SOURCE</b>             | <b>IDENTIFIER</b>                |
|-----------------------------------|---------------------------|----------------------------------|
| SirT1 (D1D7) Rabbit mAb           | Cell Signaling Technology | Cst #9475S                       |
| Rabbit polyclonal anti- NQO1      | Cell Signaling Technology | Affinity#DF6437,RRID: AB_2838400 |
| Rabbit polyclonal anti-GPX4       | Cell Signaling Technology | Affinity#DF6701,RRID: AB_2838663 |
| Rabbit polyclonal anti-FOXO3A     | Cell Signaling Technology | Affinity#AF6020,RRID: AB_2834954 |
| Rabbit polyclonal anti-beta Actin | Cell Signaling Technology | Affinity#AF7018,RRID: AB_2839420 |
| Rabbit polyclonal anti-SIRT3      | Cell Signaling Technology | Affinity#AF5135 RRID:AB_2837621  |

**Table S5 Kit indicators**

| <b>Name of reagent</b>  | <b>Source</b> | <b>IDENTIFIER</b> |
|-------------------------|---------------|-------------------|
| GCL Assay Kit           | Solarbio      | BC1215            |
| GR Assay Kit            | Solarbio      | BC1165            |
| CAT Assay Kit           | Solarbio      | BC0205            |
| SOD Assay Kit           | Solarbio      | BC0175            |
| Gpx Assay Kit           | Beyotime      | S0056             |
| GSH and GSSG Assay Kit  | Beyotime      | S0053             |
| MDA Assay Kit           | Solarbio      | BC0025            |
| ROS Assay Kit           | JINGMEI       | JM-10531R1        |
| IL-6 Assay Kit          | MEIMIAN       | 3914              |
| GSH Assay Kit           | Solarbio      | BC1175            |
| TNF- $\alpha$ Assay Kit | MEIMIAN       | 1112              |
