# Supplementary figures and images for: Longevity extension in rats via improved redox homeostasis with high carbohydrate diet intervention from weaning to adulthood: a comprehensive multi-omics study
Source: Royal Society of Chemistry journal article supplement (doi:10.1039/d4fo01156b), 2024-01-01

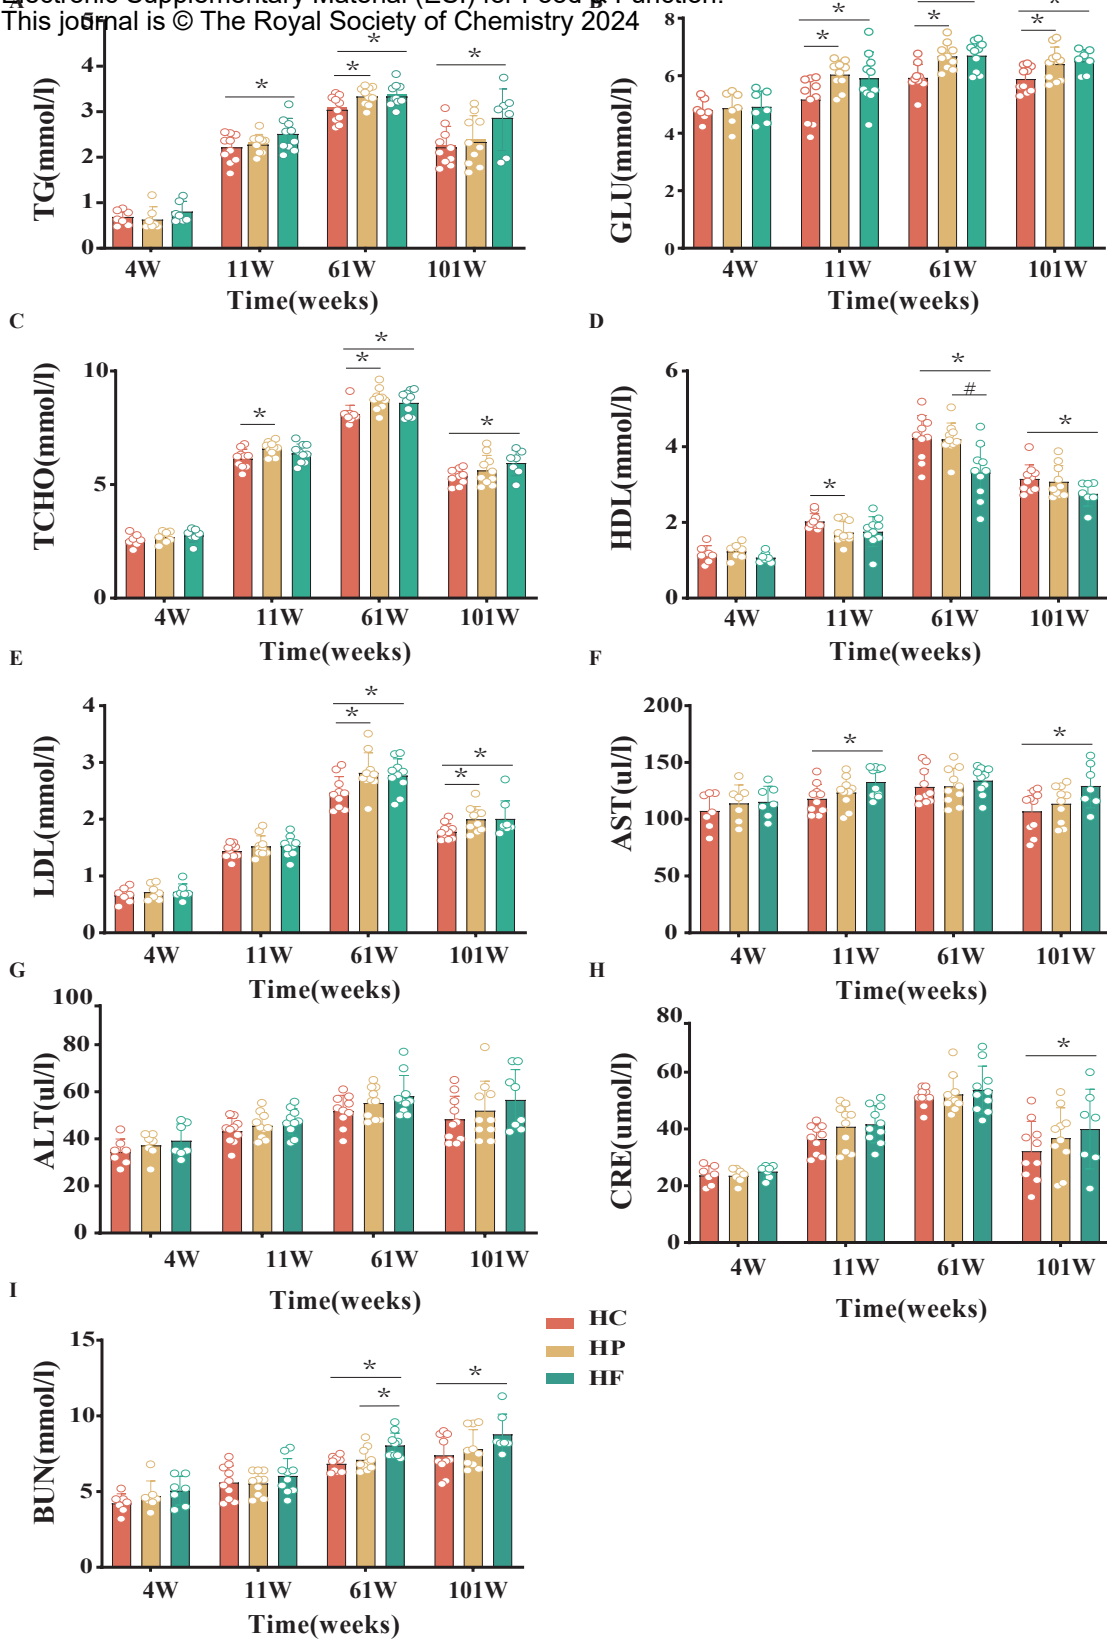

Supplement: d4fo01156b2.pdf [file d4fo01156b2.pdf]

### Organic Acid

### Amino Acid

### Fatty Acid

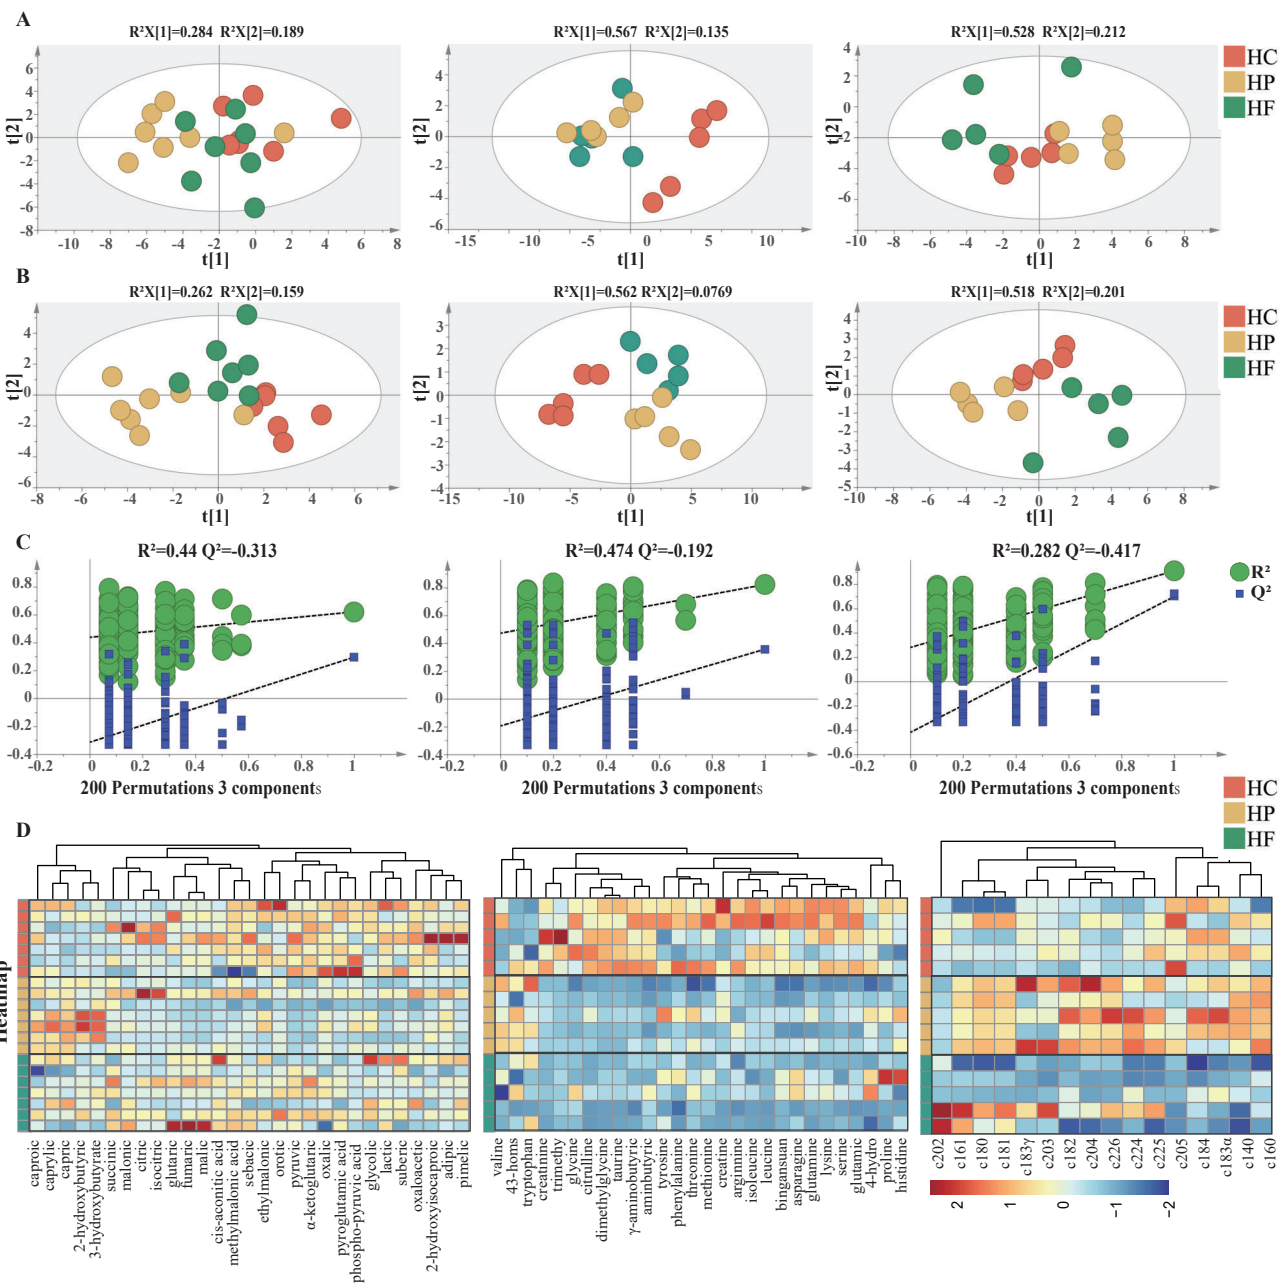

Supplement: d4fo01156b3.pdf [file d4fo01156b3.pdf]

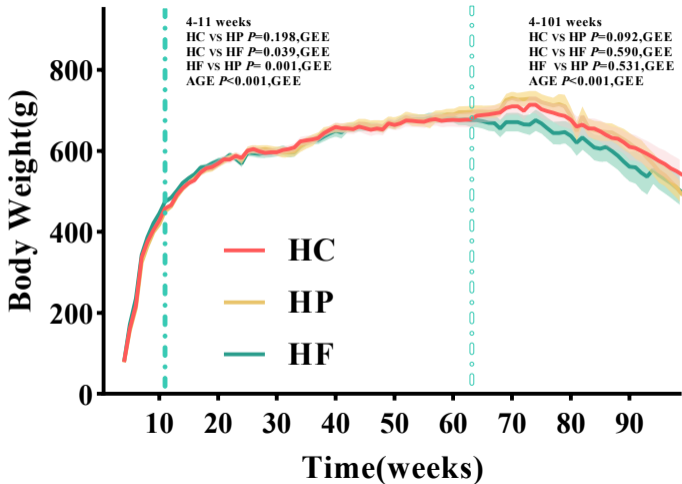

Supplement: d4fo01156b5.pdf [file d4fo01156b5.pdf]
